# Supplementary material for: Multidimensional Epistasis and the Transitory Advantage of Sex
Source: PubMed Central journal article supplement (PMC4168978; doi:10.1371/journal.pcbi.1003836), 2014-09-18
Supplement: pcbi.1003836.s001.pdf [file pcbi.1003836.s001.pdf]

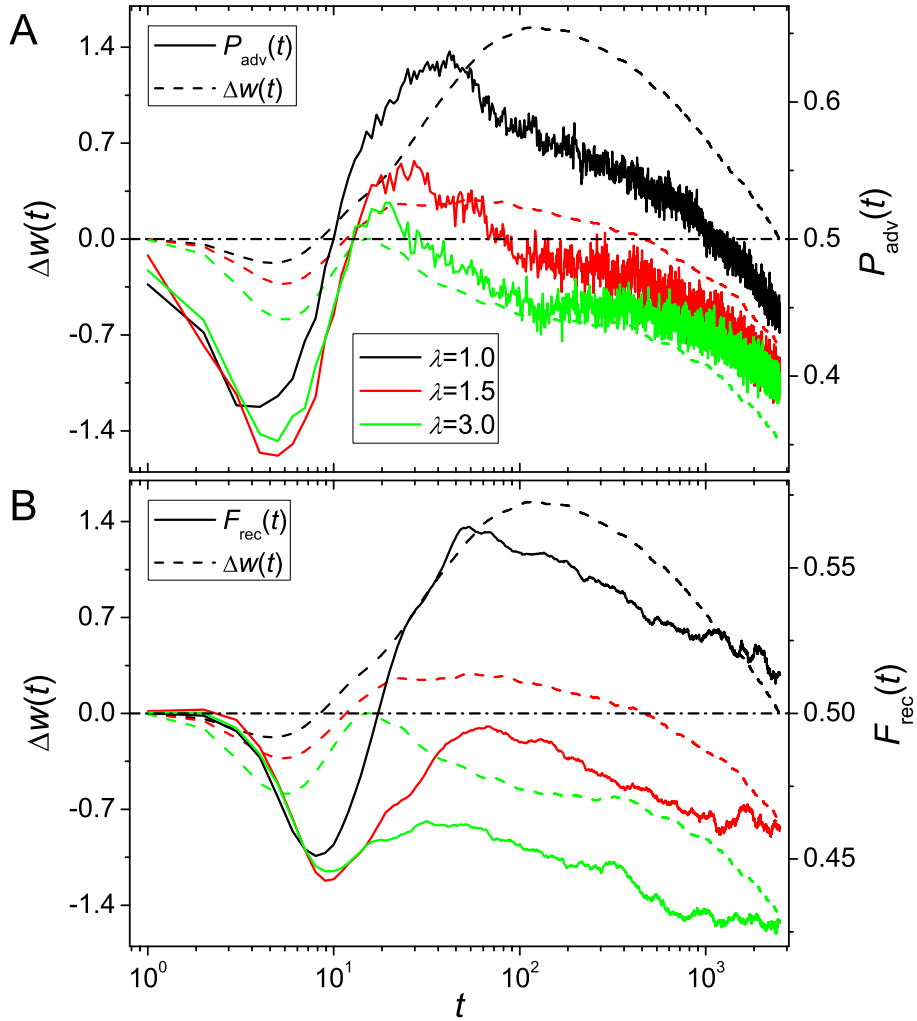

**Figure S1.** Comparison of  $\Delta w(t)$ ,  $P_{\text{adv}}(t)$  and the frequency of recombining individuals for the case with a modifier allele  $F_{\text{rec}}$  as quantifiers for the (dis-)advantage of recombination. Parameters are the same as in fig. 2. All quantities are correlated and show qualitatively the same behavior. Nevertheless, there are regions on the time axis where  $\Delta w$  shows a recombination advantage while  $P_{\text{adv}}(t)$  indicates a disadvantage and vice versa. This implies that the distribution of  $\Delta w$  is not centered around the mean value, or more precisely, the mean value is not equal to the median.
