# Supplementary material for: Multidimensional Epistasis and the Transitory Advantage of Sex
Source: PubMed Central journal article supplement (PMC4168978; doi:10.1371/journal.pcbi.1003836), 2014-09-18
Supplement: pcbi.1003836.s002.pdf [file pcbi.1003836.s002.pdf]

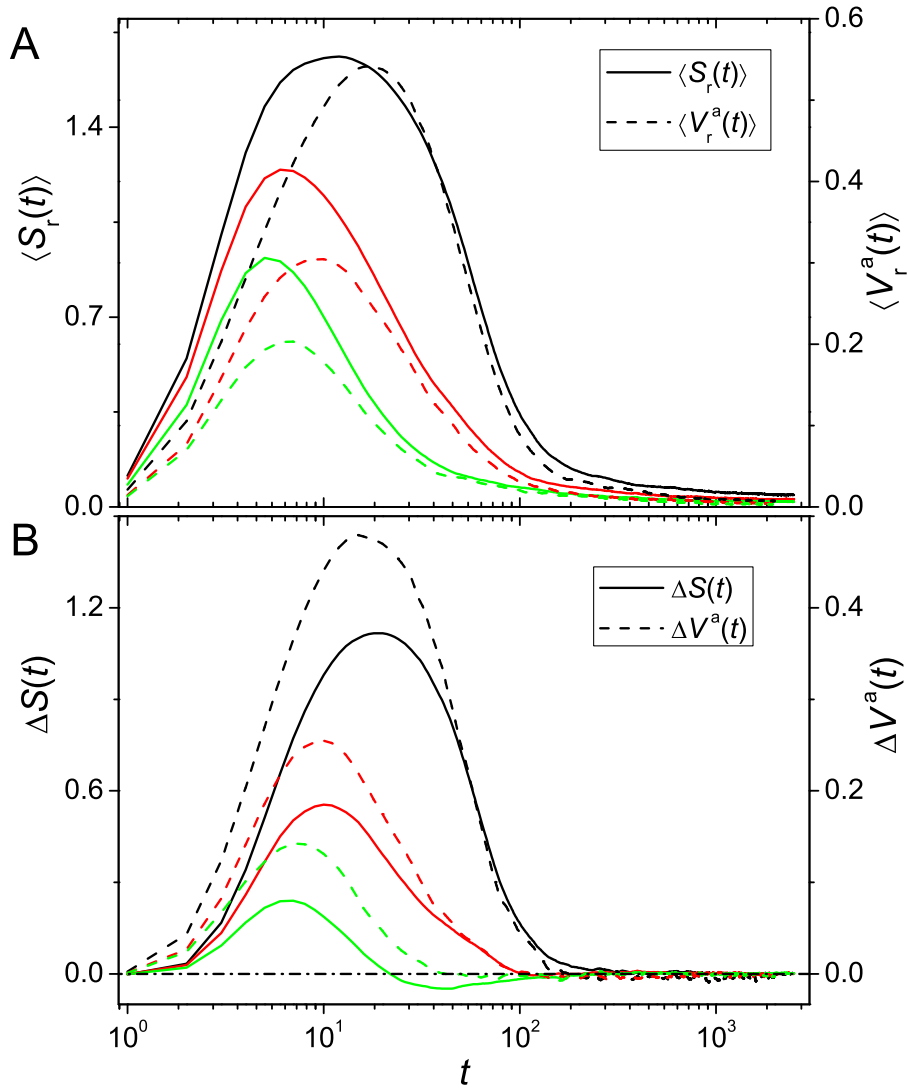

**Figure S2.** Comparison of the entropy  $S_r$  and the additive genetic variance  $V_r^a$  (A) as well as  $\Delta S$  and  $\Delta V^a$  (B). Parameters are the same as in fig. 2. All quantities are correlated and show qualitatively the same behavior.
