# Supplementary material for: Multidimensional Epistasis and the Transitory Advantage of Sex
Source: PubMed Central journal article supplement (PMC4168978; doi:10.1371/journal.pcbi.1003836), 2014-09-18
Supplement: pcbi.1003836.s003.pdf [file pcbi.1003836.s003.pdf]

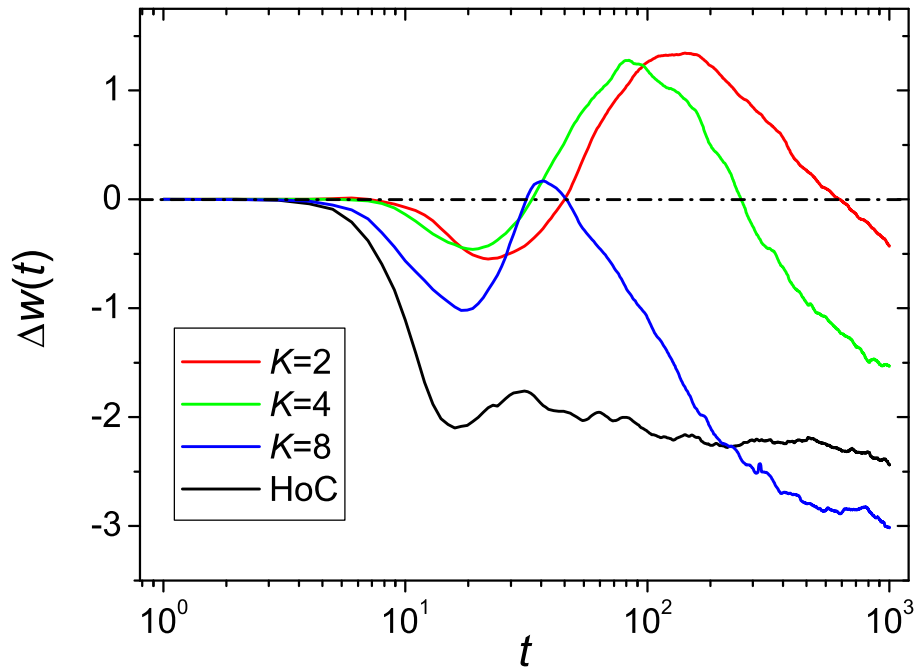

**Figure S3.** Transitory advantage of recombination on Kauffman’s NK-landscape with  $L = 16$  binary loci. Each locus interacts with  $K$  adjacent neighbors, and fitness values are drawn from a lognormal distribution. Population parameters are  $N = 1000$  and  $N\mu = 2$ . For increasing ruggedness, i.e., for increasing values of  $K$ , the advantage becomes less pronounced and vanishes. Data marked ‘HoC’ correspond to the maximally rugged case  $K = L - 1 = 15$ , where the NK-model reduces to the House of Cards model with uncorrelated random fitness values.
