# Supplementary material for: Multidimensional Epistasis and the Transitory Advantage of Sex
Source: PubMed Central journal article supplement (PMC4168978; doi:10.1371/journal.pcbi.1003836), 2014-09-18
Supplement: pcbi.1003836.s004.pdf [file pcbi.1003836.s004.pdf]

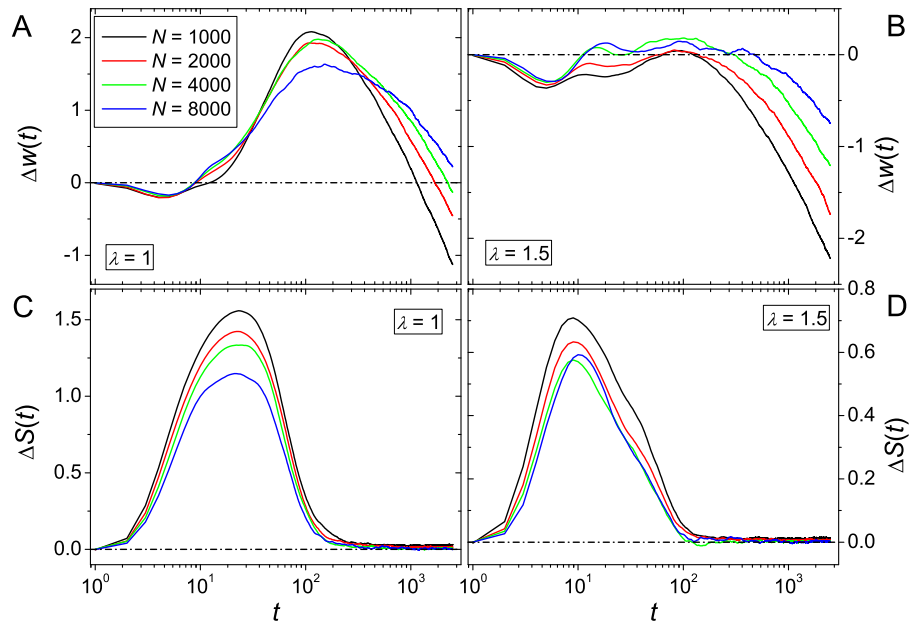

**Figure S4.** Dependence of the recombinational advantage on population size. Same as figure 3 but with constant  $N\mu = 8$  and varying population size  $N$ .
