# Supplementary material for: Multidimensional Epistasis and the Transitory Advantage of Sex
Source: PubMed Central journal article supplement (PMC4168978; doi:10.1371/journal.pcbi.1003836), 2014-09-18
Supplement: pcbi.1003836.s005.pdf [file pcbi.1003836.s005.pdf]

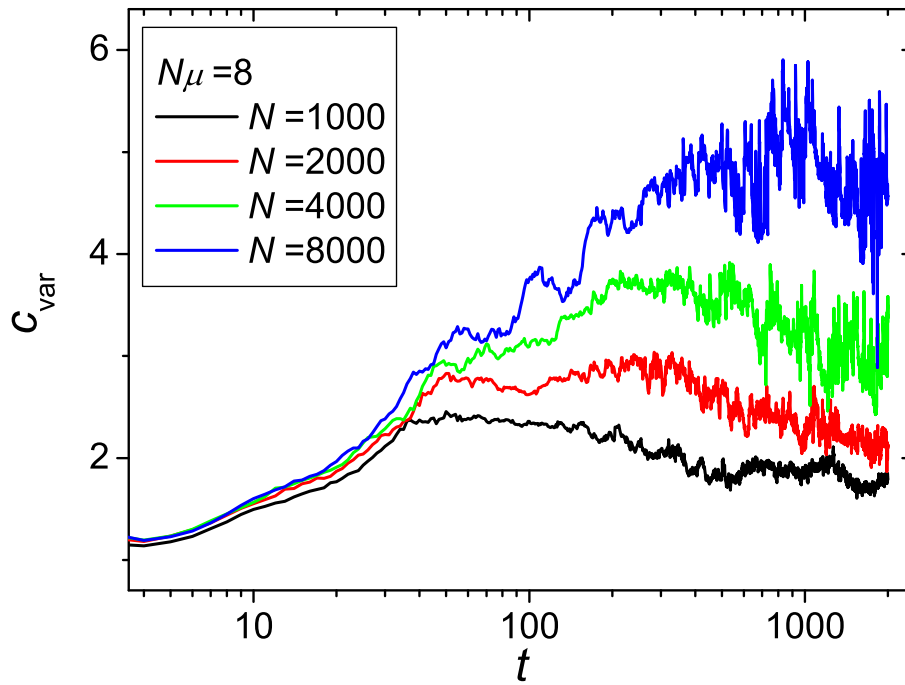

**Figure S5.** The coefficient of variation  $c_{\text{var}}$  of the number of mutants that are not located at the most populated genotype when the latter is a local optimum vs.  $t$  for systems with  $r = 1$ ,  $c = 1$ , and  $\lambda = 1$ . Note that, for constant  $N\mu$ ,  $c_{\text{var}}$  increases with  $N$ .
