# Supplementary material for: Multidimensional Epistasis and the Transitory Advantage of Sex
Source: PubMed Central journal article supplement (PMC4168978; doi:10.1371/journal.pcbi.1003836), 2014-09-18
Supplement: pcbi.1003836.s006.pdf [file pcbi.1003836.s006.pdf]

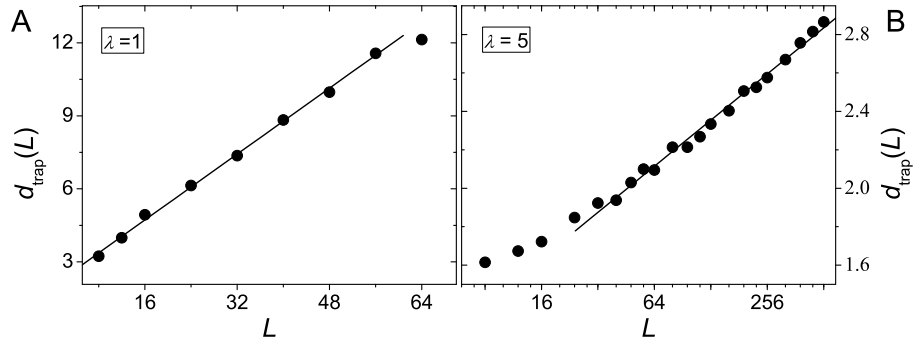

**Figure S6.** Trapping distance increases with landscape dimensionality. The figure shows the distance  $d_{\text{trap}}$  at which populations are trapped for the first time vs. number of loci  $L$  for  $N = 2000$ ,  $N\mu = 4$ ,  $c = 1$ , and (A)  $\lambda = 0.75$ , (B)  $\lambda = 5$ . Straight lines are guides to the eye and show that the  $L$ -dependencies are well compatible with a (A) linear and (B) logarithmic relation, respectively.
