# Supplementary material for: Multidimensional Epistasis and the Transitory Advantage of Sex
Source: PubMed Central journal article supplement (PMC4168978; doi:10.1371/journal.pcbi.1003836), 2014-09-18
Supplement: pcbi.1003836.s007.pdf [file pcbi.1003836.s007.pdf]

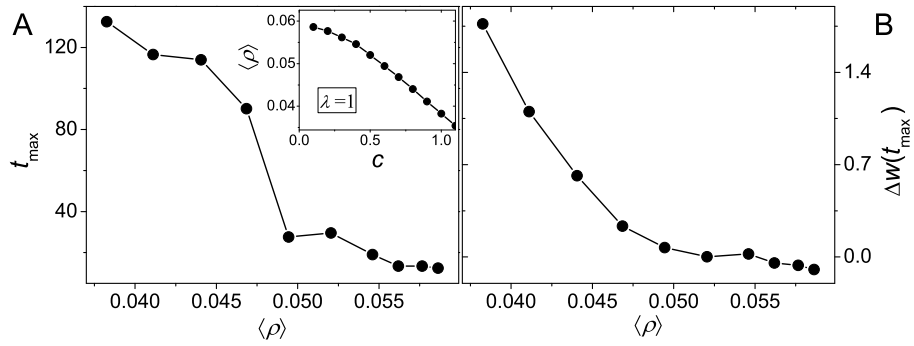

**Figure S7.** Recombinational advantage declines with the density of local maxima. To clarify whether the time of maximal recombination advantage,  $t_{\max}$ , increases with decreasing density of local maxima,  $\rho$ , we measured  $\Delta w(t_{\max})(\langle \rho \rangle)$  and  $t_{\max}(\langle \rho \rangle)$  in simulations, where  $\langle \rho \rangle$  is the mean density of maxima averaged over realizations as well as over genotype space (recall that the density of maxima is inhomogeneous in the RMF model). Panel (A) shows  $t_{\max}$  and panel (B) the corresponding maximal advantage  $\Delta w(t_{\max})$  vs.  $\langle \rho \rangle$ . Both quantities decline monotonically with increasing  $\langle \rho \rangle$ . The density was controlled by changing the slope  $c$  for fixed  $\lambda = 1$  (see inset of panel (A)). Data correspond to  $N = 1000$ ,  $N\mu = 4$  and  $\lambda = 1$ .
