# Supplementary material for: Multidimensional Epistasis and the Transitory Advantage of Sex
Source: PubMed Central journal article supplement (PMC4168978; doi:10.1371/journal.pcbi.1003836), 2014-09-18
Supplement: pcbi.1003836.s008.pdf [file pcbi.1003836.s008.pdf]

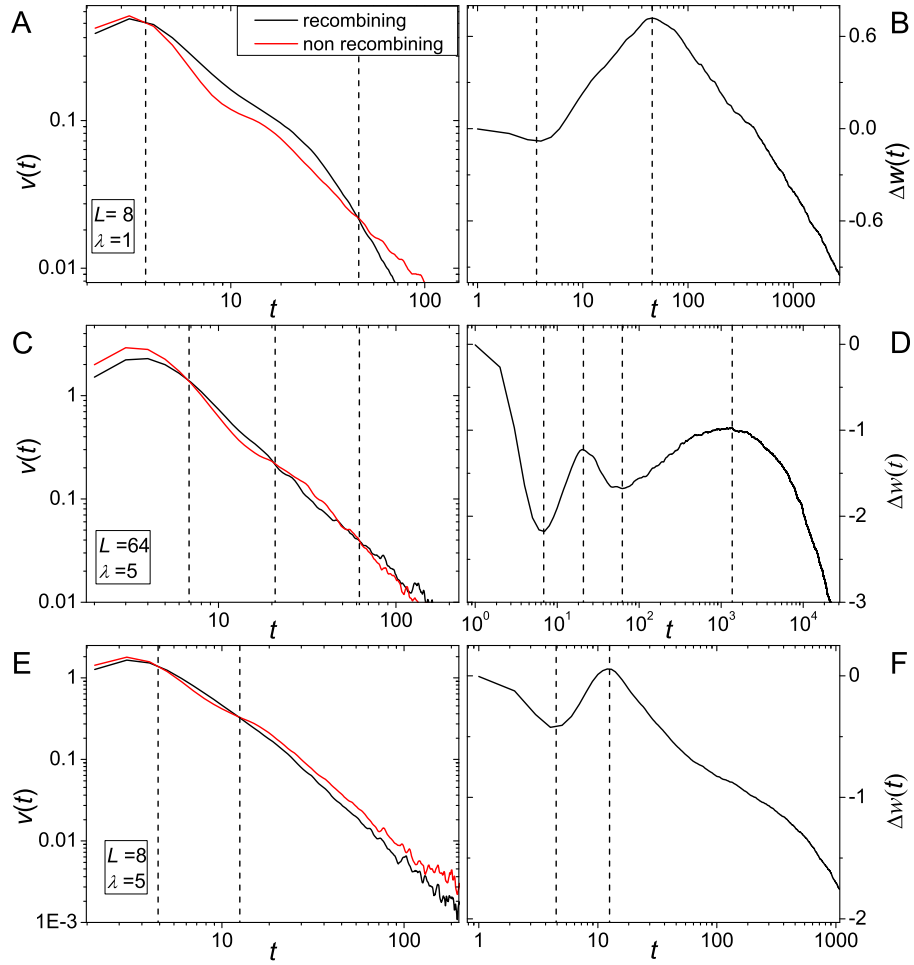

**Figure S8.** (A), (C), and (E): Fitness velocities vs.  $t$  for systems with parameters  $N = 2000$ ,  $N\mu = 4$ , and  $c = 1$ . Intersections are marked by dashed lines. (B), (D), and (F): Corresponding curve for  $\Delta w$  vs.  $t$ . Compare with curves in the schematic pictures in fig. 8.
